# Supplementary material
Source: publisher site journal article supplement (https://www.dovepress.com/article/534881)
Supplement: Supplementary file 1 [file 534881%20Revised%20Figure%20S1-S4.docx]

**SUPPLEMENTARY MATERIALS**

**
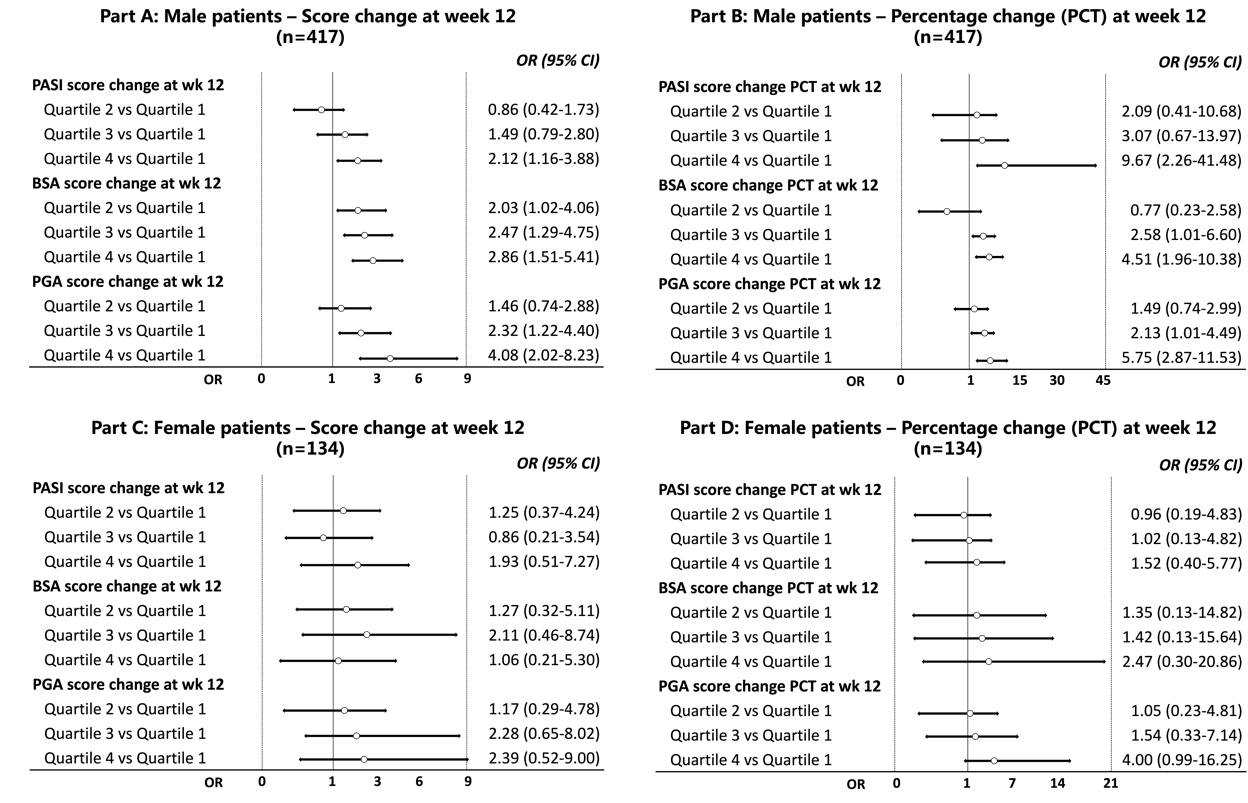
**

**Figure S1 Sex-Stratified Forest Plots of Quartile Changes in PASI, BSA, and PGA for Achieving a ≥90% Reduction in DLQI**

(A) Male patients – score change; (B) Male patients – percentage change; (C) Female patients – score change; (D) Female patients – percentage change.

OR, odds ratio; CI, confidence interval; PASI, psoriasis area and severity index; BSA, body surface area; PGA, Physician's Global Assessment; PCT, percentage; wk, week; Quartile 1 (P0-P25); Quartile 2 (P25-P50); Quartile3 (P50-P75); Quartile 4 (P75-P100)


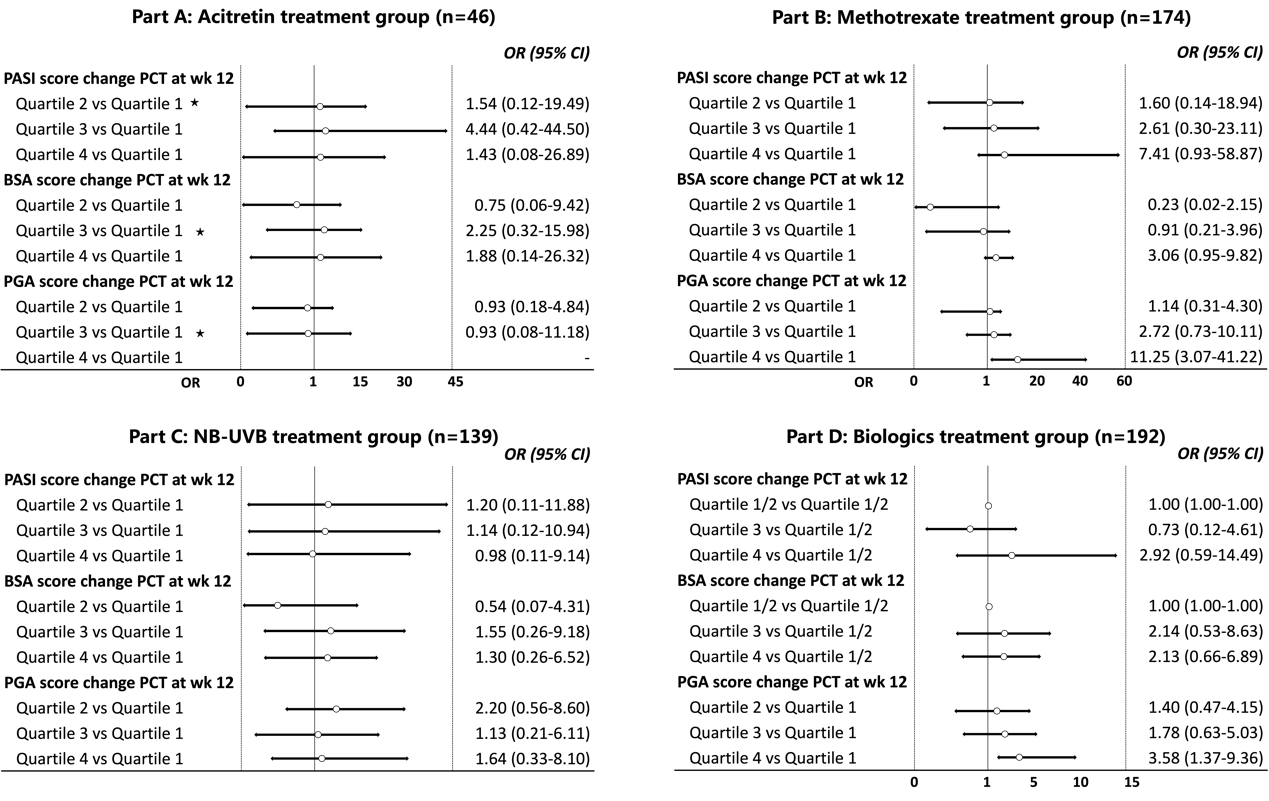


**Figure S2 Forest Plots by Treatment Modality for Score Changes in PASI, BSA, and PGA in Achieving a ≥90% Reduction in DLQI**

(A) Acitretin treatment group; (B) Methotrexate treatment group; (C) NB-UVB treatment group; (D) Biologics treatment group.

OR, odds ratio; CI, confidence interval; PASI, psoriasis area and severity index; BSA, body surface area; PGA, Physician's Global Assessment; NB-UVB, narrow band ultraviolet; Quartile 1 (P0-P25); Quartile 2 (P25-P50); Quartile3 (P50-P75); Quartile 4 (P75-P100). ★: number of patients in the quartile was 0, the OR could not be calculated.


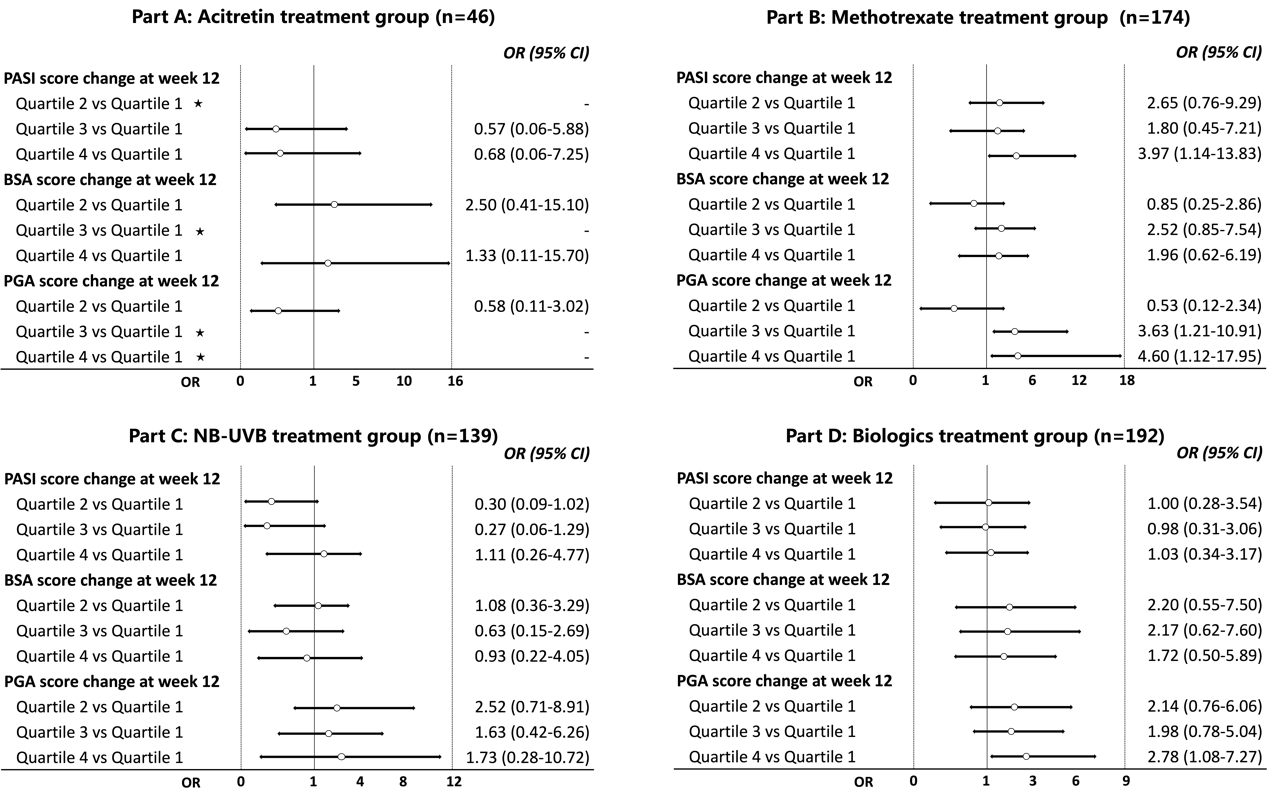


**Figure S3 Forest Plots by Treatment Modality for Score Percentage Changes in PASI, BSA, and PGA in Achieving a ≥90% Reduction in DLQI**

(A) Acitretin treatment group; (B) Methotrexate treatment group; (C) NB-UVB treatment group; (D) Biologics treatment group.

OR, odds ratio; CI, confidence interval; PASI, psoriasis area and severity index; BSA, body surface area; PGA, Physician's Global Assessment; PCT, percentage; NB-UVB, narrow band ultraviolet; Quartile 1 (P0-P25); Quartile 2 (P25-P50); Quartile3 (P50-P75); Quartile 4 (P75-P100). ★: number of patients in the quartile was 0, the OR could not be calculated.


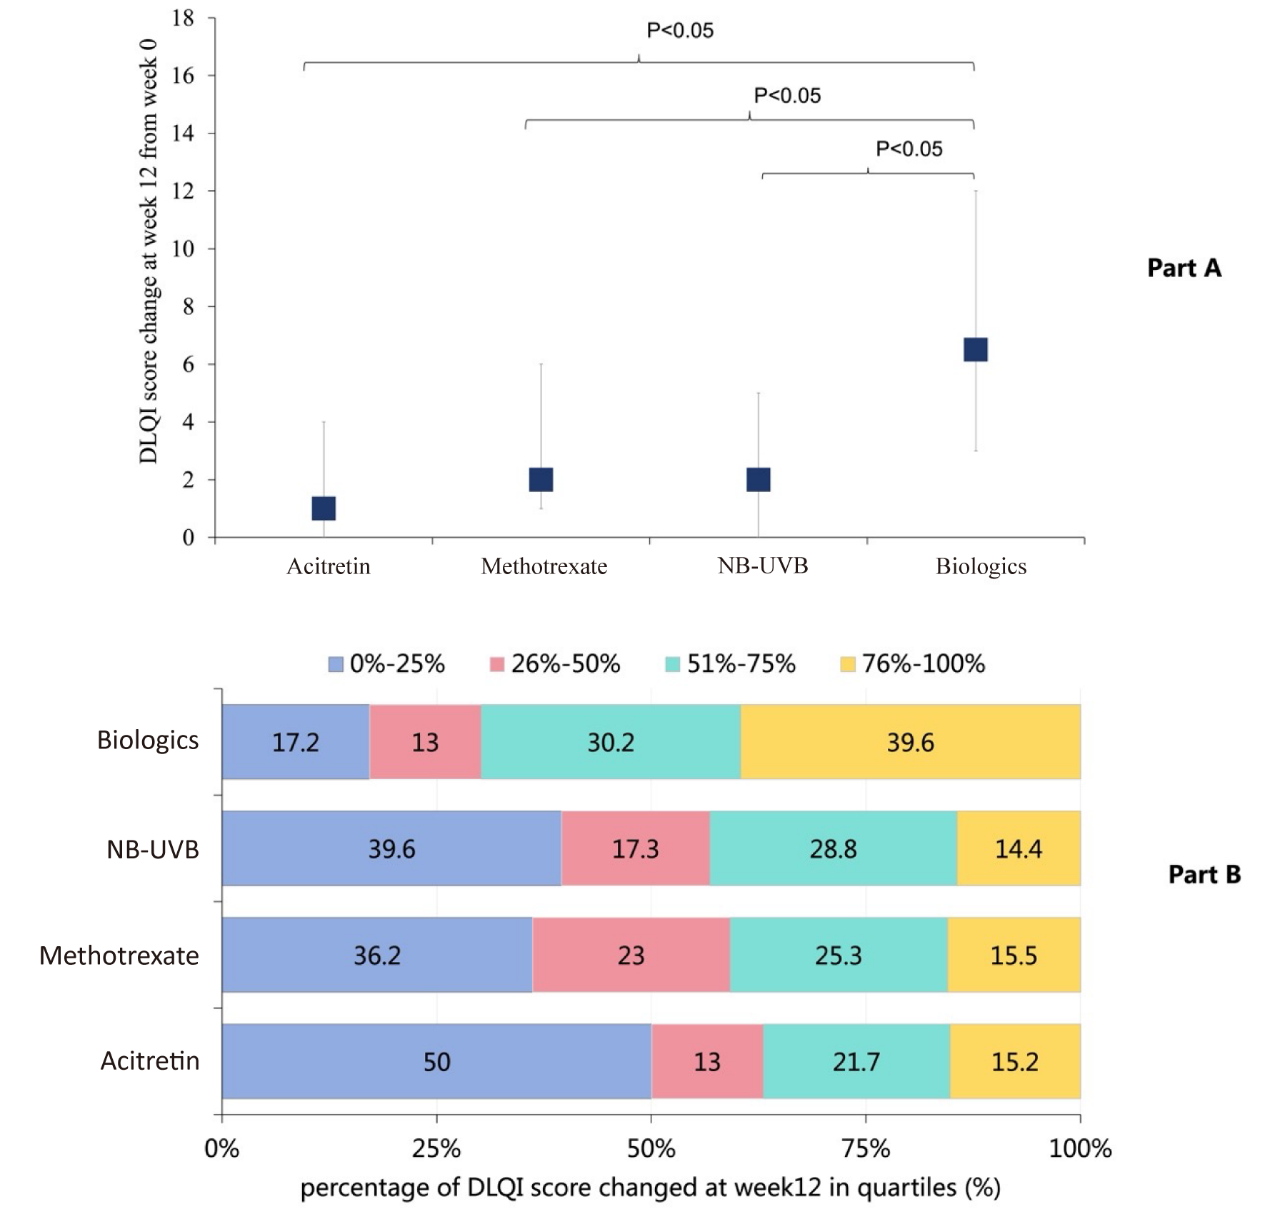


**Figure S4** Comparison of DLQI Improvement Across Treatment Modalities

(A) Mean change in Dermatology Life Quality Index (DLQI) score from baseline to week 12 across four treatment modalities: acitretin, methotrexate, narrowband ultraviolet B (NB-UVB), and biologics. Error bars represent standard deviations. Significant between-group differences were observed, with biologics showing the greatest DLQI improvement (*P* < 0.05 for all comparisons with biologics).

(B) Distribution of DLQI improvement at week 12 stratified by treatment group and expressed as percentage change quartiles: 0%–25%, 26%–50%, 51%–75%, and 76%–100%.
